# Supplementary material
Source: Springer Nature journal article supplement (https://www.springermedizin.de/resource/supplementary/12874_2009_457_MOESM1_ESM.pdf/9432132)
Supplement: MOESM1 [file 9432132]

**Ranking**

1

2

3

4

**Treatment**

|             |      |      |      |      |
|-------------|------|------|------|------|
| Placebo     | 0.00 | 0.01 | 0.41 | 0.57 |
| Fluticasone | 0.00 | 0.02 | 0.56 | 0.42 |
| Salmeterol  | 0.29 | 0.68 | 0.02 | 0.00 |
| SFC         | 0.71 | 0.28 | 0.00 | 0.00 |

Placebo

0.00

0.01

0.41

0.57

Fluticasone

0.00

0.02

0.56

0.42

Salmeterol

0.29

0.68

0.02

0.00

SFC

0.71

0.28

0.00

0.00
